# Supplementary material for: Recent evolution and associated hydrological dynamics of a vanishing Tropical Andean glacier: Glaciar de Conejeras, Colombia
Source: Copernicus journal article supplement (doi:10.5194/hess-2018-167), 2018-04-09
Supplement: Supplementary file [file hess-2018-167-AC1-supplement.pdf]

Enrique Morán Tejada, on behalf of the co-authors

Dear Editor, we are pleased to submit a revised version of the manuscript entitled “Recent evolution and associated hydrological dynamics of a vanishing Tropical Andean glacier”. In this document we respond to every comment done by the reviewers, emphasizing the changes done in the manuscript, or the reasons why some suggested changes (the least) were not implemented. We have undertaken a thorough revision, including changes in figures, with new analyses, large portions of the text, new paragraphs in the introduction and discussion sections as well as all the line-specific changes suggested by the reviewers.

In light of the recommendations by the two reviewers, suggesting an English revision of the manuscript (albeit the original manuscript had been already revised by a native English speaker), the manuscript has been carefully checked by a professional English editor

We believe that the revised version of the manuscript, thanks to all the changes suggested by the reviewers, is more solid and compelling and hope that the editor takes this revised version for publication.

#### **Referee #1**

*This paper presented glacier dynamics of a Colombian glacier, which is close to ex-tinction. In general, the results are well presented and the paper, of course, fits well into a series of articles published recently (e.g. Rabatel et al. 2017). I do recommend publication of this paper after some minor revisions, such as adding a few references. I believe that proof reading by a native English speaker would be an advantage.*

*It is notable that the authors tried to give some attention to volcanic activities; more or less similar to that occurring in Mexico (even though not exactly belong to “tropical” glaciers).*

*A 57% reduction in the last three decades is comparable to the Peruvian and Bolivian glaciers in the eastern cordilleras. However, as the authors mentioned, it is highly dependent on size and altitude (and many more).*

#### *References:*

*Granados, H.D., Miranda, P.J., Nunez, G.C., Alzate, B.P., Mothes, P., Roa, H.M., Correa, B.E.C., Ramos, J.C., 2015. Hazards at ice-clad volcanoes: phenomena, processes, and example from Mexico, Colombia, Ecuador, and Chile. In: Haeberli, W., Whiteman, C., Shroder, J.F. (Eds.), Chapter 17, Snow and Ice-related Hazards. Risks and Disasters, pp. 607-646*

*Morris, J.N., Poole, A.J., Klein, A.G., 2006. Retreat of tropical glaciers in Colombia and Venezuela from 1984 to 2004 as measured from ASTER and Landsat images. In: Proceedings of the 63rd Eastern Snow Conference, Newark, Delaware, USA, 181-191.*

*Rekowsky, I.C., 2016. Variações de área das geleiras da Colômbia e da Venezuela entre 1985 e 2015, com dados de sensoriamento. MSc Dissertation. Federal University of Rio Grande do Sul (UFRGS), Brazil.*

Authors: We are grateful by the words of the reviewer. We have included the suggested references, which were not on our original list
